# Supplementary material
Source: publisher figshare collection journal article supplement (https://tandf.figshare.com/ndownloader/files/18047543)
Supplement: Supplementary file 1 [file 18047543]

|  |  |  | **FGPS1 Pattern Type** | | | | | | | | | | | |
| --- | --- | --- | --- | --- | --- | --- | --- | --- | --- | --- | --- | --- | --- | --- |
|  |  | **Normal** | **1** | **2** | | | **3** | | **4** | **5** | | **6** | | **7** |
|  |  |  |  |  | | |  | |  |  | |  | |  |
| **number** |  | 48 | 34 | 12 | | | 11 | | 2 | 13 | | 5 | | 1 |
| **%** |  | 38.2 | 27.3 | 9.4 | | | 8.6 | | 1.6 | 10.2 | | 3.9 | | 0.8 |
|  |  |  |  |  | | |  | |  |  | |  | |  |
|  |  |  | **Fetal Biometry in the Third Trimester** | | | | | | | | | | |  |
| **no. of scans** |  | 239 | 129 | | 57 | 49 | | 8 | | | 70 | | 22 | 6 |
| **aver/fetus** |  | 5.0 | 3.8 | | 4.8 | 4.5 | | 4.0 | | | 5.4 | | 4.4 | 6.0 |
|  |  |  |  | |  |  | |  | | |  | |  |  |
|  |  |  | **Combined Biometry and Doppler Evaluations in the Third Trimester** | | | | | | | | | | |  |
| **UA (%)** |  | 99.6 | 97.7 | | 100.0 | 93.9 | | 100 | | | 98.6 | | 90.9 | 100.0 |
| **MCA (%)** |  | 52.3 | 60.5 | | 59.6 | 73.5 | | 100 | | | 67.1 | | 54.5 | 16.7 |
| **AI (%)** |  | 23.8 | 24.0 | | 21.1 | 28.6 | | 25.0 | | | 20.0 | | 13.6 | 0.0 |
| **DV (%)** |  | 38.5 | 32.6 | | 35.1 | 63.3 | | 87.5 | | | 61.4 | | 45.5 | 16.7 |
| **MPI (%)** |  | 69.0 | 69.8 | | 73.7 | 59.2 | | 50.0 | | | 51.4 | | 72.7 | 50.0 |
|  |  |  |  | |  |  | |  | | |  | |  |  |
| UA: umbilical artery; MCA: middle cerebral artery; AI: aortic isthmus; DV: Ductus Venosus; MPI: Myocardial Performance Index | | | | | | | | | | | | | | |

**Supplementary Table 1.**  **Biometry and Doppler Ultrasound Findings in FGPS1 Pattern Groups**
